# Supplementary material for: Delayed breastfeeding initiation and infant survival: A systematic review and meta-analysis
Source: PubMed Central journal article supplement (PMC5528898; doi:10.1371/journal.pone.0180722), 2017-07-26
Supplement: pone.0180722.s003.pdf [file pone.0180722.s003.pdf]

**S1 Table. Summary of Relevant Studies**

| Study               | Population                                                                          | Study Design                                               | Exposure Definition                                                                  | Outcomes Definitions                        | Summary of Limitations                                                                                                                                                                                                                                           | Quality Score |
|---------------------|-------------------------------------------------------------------------------------|------------------------------------------------------------|--------------------------------------------------------------------------------------|---------------------------------------------|------------------------------------------------------------------------------------------------------------------------------------------------------------------------------------------------------------------------------------------------------------------|---------------|
| Akter 2015          | Bangladesh Demographic and Health Survey                                            | Cross-sectional                                            | Early (<1 hr) vs. Late (>1 hr) breastfeeding initiation                              | Neonatal Mortality                          | Inadequate sample size (n=3190). Risk of selection bias due to cross-sectional study design. Risk of information bias due to long recall period (up to 3 years). Did not account for reverse causality.                                                          | Very low      |
| Bamji 2008          | India: Medak district, Andhra Pradesh                                               | Retrospective (1998-2001) and prospective (2001-03) cohort | Early (<24 hrs) vs. Late (≥24 hrs) breastfeeding initiation                          | Neonatal Mortality                          | Risk of selection/attrition bias because 30% of selected women were not reachable for postpartum assessment. Risk of information bias due to long recall (1-2 months after birth). Inadequate adjustment for confounding. Did not account for reverse causality. | Very low      |
| Caglar 2006         | Turkey: Gaziosmanpasa Medical Faculty                                               | Case control                                               | Mean age at first breastfeeding (in hours)                                           | Weight loss <10%                            | No adjustment for confounding.                                                                                                                                                                                                                                   | Very low      |
| Clemens 1999        | Egypt : Abu Homos district                                                          | Prospective cohort study                                   | Early (<3 days) vs. Late (>3 days) breastfeeding initiation                          | Diarrhea                                    | Adjusted models do not include a term for preterm or low birthweight status.                                                                                                                                                                                     | Low           |
| Dewey 2003          | USA: Davis, California                                                              | Prospective cohort                                         | Early (<1 hr) vs. Late (>1 hr) breastfeeding initiation                              | Excess weight loss at day 3                 | Inadequate adjustment for confounding. Did not account for reverse causality.                                                                                                                                                                                    | Very low      |
| Edmond 2006         | Ghana: Kintampo, Wenchi, Techiman, and Nkoranza districts in the Brong Ahafo region | Prospective cohort (within RCT)                            | Early (<1 hr) vs. Late (1-24 hr, 24-48 hr, 48-72 hr ≥72 hr) breastfeeding initiation | Neonatal Mortality                          | None                                                                                                                                                                                                                                                             | Moderate      |
| Engelbrechtsen 2008 | Uganda: Mbale district                                                              | Cross-sectional                                            | Early (<2 hr) vs. Late (2-24 hr, >24 hr) breastfeeding initiation                    | Stunted (HAZ < -2 SD), Wasted (WHZ < -2 SD) | Risk of selection bias. Inadequate adjustment for confounding. Did not account for reverse causality.                                                                                                                                                            | Very low      |

**S1 Table (continued).** Summary of Relevant Studies

| Study                                                                                | Population                                                                                                  | Study Design                       | Exposure Definition                                                                    | Outcomes Definitions                                                           | Summary of Limitations                                                                                                                                                                                              | Quality Score |
|--------------------------------------------------------------------------------------|-------------------------------------------------------------------------------------------------------------|------------------------------------|----------------------------------------------------------------------------------------|--------------------------------------------------------------------------------|---------------------------------------------------------------------------------------------------------------------------------------------------------------------------------------------------------------------|---------------|
| Enzunga 1990                                                                         | Zaire: Evangelical Medical Centre                                                                           | Prospective cohort                 | Time of breastfeeding initiation (hrs)                                                 | Weight loss since birth                                                        | The inclusion criteria and loss to follow up are not described. There is no information regarding assessment of exposure or outcome. There is no adjustment for confounding. Did not account for reverse causality. | Very low      |
| Garcia 2011                                                                          | India: Tamil Nadu                                                                                           | Cohort                             | Early (<12 hr) vs. Late (12-24 hrs, > 24 hrs) breastfeeding initiation                 | Neonatal Mortality                                                             | None                                                                                                                                                                                                                | Moderate      |
| Hajeebhoy 2014                                                                       | Vietnam: 11 provinces                                                                                       | Cross-sectional                    | Early (<1 hr) vs. Late (>1 hr) breastfeeding initiation                                | Diarrhea<br>ARI                                                                | Risk of selection bias due to cross-sectional study design. Risk of information bias due to long recall period (up to 3.2 months). Inadequate adjustment for confounding. Did not account for reverse causality.    | Very low      |
| Meshram 2012                                                                         | India: Medak district, Andhra Pradesh                                                                       | Cross-sectional                    | Early (<1 hr) vs Late (1-3 hrs, 4-12 hrs, 13-24 hrs, >24 hrs) breastfeeding initiation | Stunted (HAZ < -2 SD),<br>Underweight (WAZ < -2 SD),<br>Wasted (WHZ < -2 SD)   | Inadequate sample size. Risk of selection bias due to cross-sectional study design. Inadequate adjustment for confounding.                                                                                          | Very low      |
| Mullany 2008                                                                         | Nepal: Sarlahi District                                                                                     | Prospective cohort (within a RCT)  | Early (<1 hr) vs. Late (1-24 hr, 24-48 hr, 48-72 hr >=72 hr) breastfeeding initiation  | Neonatal Mortality                                                             | None                                                                                                                                                                                                                | Moderate      |
| Mullany 2010                                                                         | Nepal: Sarlahi District                                                                                     | Prospective cohort (within a RCT)  | Breastfeeding initiation (hrs) <24 hrs and >=24 hrs                                    | Hypothermia                                                                    | None                                                                                                                                                                                                                | Moderate      |
| Mullany 2009                                                                         | Tanzania: Pemba Island                                                                                      | Prospective cohort (within a RCT)  | Early (<1 hr) vs. Late* (>=1 hr) breastfeeding initiation                              | Umbilical cord infection                                                       | None                                                                                                                                                                                                                | Moderate      |
| Neovita Study Group 2016<br>[Includes: Edmond 2015<br>Masanja 2015<br>Mazunder 2015] | Ghana, India, Tanzania:<br>BrongAhafo<br>Ghana, Haryana<br>India, Dar es Salaam and<br>Morogoro<br>Tanzania | Prospective cohort (within 3 RCTs) | Early (<=1 hr) vs. Late (2-24 hr, >24 hr) breastfeeding initiation                     | Neonatal Mortality,<br>Mortality from 1-3 months,<br>Mortality from 3-6 months | None                                                                                                                                                                                                                | Moderate      |

**S1 Table (continued).** Summary of Relevant Studies

| Study              | Population                                                | Study Design                    | Exposure Definition                                                      | Outcomes Definitions                                                     | Summary of Limitations                                                                                                              | Quality Score |
|--------------------|-----------------------------------------------------------|---------------------------------|--------------------------------------------------------------------------|--------------------------------------------------------------------------|-------------------------------------------------------------------------------------------------------------------------------------|---------------|
| Niswade 2011       | India: Nagpur district                                    | Cohort                          | Delayed initiation of breastfeeding (not defined)                        | Neonatal Mortality                                                       | Did not account for reverse causality.                                                                                              | Very low      |
| Shah 2014          | Bangladesh: Sylhet district                               | Prospective cohort (within RCT) | Early (<1 hr) vs. Late (>1 hr) breastfeeding initiation                  | Neonatal Mortality                                                       | None                                                                                                                                | Moderate      |
| Sutan 2014         | Indonesia: Aceh Province                                  | Unmatched case control          | Early (<1 hr) vs. Late (>1 hr) breastfeeding initiation                  | Neonatal Mortality                                                       | Risk of information bias due to retrospective assessment of breastfeeding after child death. Did not account for reverse causality. | Very low      |
| Van den Bosch 1990 | Malawi: Kamuzu Central Hospital                           | Randomized Control Trial        | Early initiation encouragement vs. Initiation at time of mother's choice | Hypothermia: Rectal temperature <36.5°C at 2, 4, and ~24 hrs after birth | None.<br>Note that randomized groups were comparable.                                                                               | High          |
| Wren 2015          | Guatemala: Mam-Mayan communities in the Western Highlands | Cross-sectional                 | Early (<1 hr) vs. Late (>1 hr) breastfeeding initiation                  | Stunted (HAZ < -2 SD), Underweight (WAZ < -2 SD), Wasted (WHZ < -2 SD)   | Inadequate sample size. Inadequate adjustment for confounding.                                                                      | Very low      |
