# Supplementary material for: Delayed breastfeeding initiation and infant survival: A systematic review and meta-analysis
Source: PubMed Central journal article supplement (PMC5528898; doi:10.1371/journal.pone.0180722), 2017-07-26
Supplement: pone.0180722.s004.pdf [file pone.0180722.s004.pdf]

**S2 Table. Quality Assessment of Included Studies**

| Study               | Score for study design                     | Risk of selection bias?                                                     | Risk of information bias?                             | Risk of attrition bias?                                                     | Adequate adjustment for confounding?                                   | Accounted for reverse causality?             | Should the score for study design be adjusted for study quality? | Score after adjustment |
|---------------------|--------------------------------------------|-----------------------------------------------------------------------------|-------------------------------------------------------|-----------------------------------------------------------------------------|------------------------------------------------------------------------|----------------------------------------------|------------------------------------------------------------------|------------------------|
| Akter 2015          | Low - Cross-sectional                      | Yes - cross sectional                                                       | Yes - recall up to 3 years allowed                    | No - not applicable due to study design                                     | Yes                                                                    | No                                           | Yes                                                              | Very low               |
| Bamji 2008          | Low - Retrospective and prospective cohort | Yes - 30% of selected women were not reachable and thus excluded from study | Yes - assessment conducted 1-2 months after delivery. | Yes - 30% of selected women were Not reachable and thus excluded from study | No - Proportions presented. No control for confounding.                | Yes - excluded 7 children who died on day 1. | Yes                                                              | Very low               |
| Caglar 2006         | Low - Case control                         | No                                                                          | No                                                    | No - not applicable due to study design                                     | No                                                                     | Yes                                          | Yes                                                              | Very low               |
| Clemens 1999        | Low - Prospective cohort                   | No                                                                          | No - median age at enrollment was 11 days (IQR 7-16). | No -loss to follow up = 10%                                                 | No - Adjusted models do not include preterm or low birthweight status. | Yes - Median age at enrollment was 11 days.  | No                                                               | Low                    |
| Dewey 2003          | Low - Prospective cohort                   | No                                                                          | No                                                    | No                                                                          | Not for our exposure and outcome of interest                           | Not for our exposure and outcome of interest | Yes                                                              | Very low               |
| Edmond 2006         | Low - Prospective cohort (within RCT)      | No                                                                          | No - median assessment at 14 days postpartum          | No                                                                          | Yes                                                                    | Yes                                          | Yes                                                              | Moderate               |
| Engelbrechtsen 2008 | Low - Cross-sectional                      | Yes - cross sectional                                                       | No                                                    | No - not applicable due to study design                                     | No                                                                     | No                                           | Yes                                                              | Very low               |
| Enzunga 1990        | Low - Prospective cohort                   | unclear                                                                     | unclear                                               | unclear                                                                     | No                                                                     | No                                           | Yes                                                              | Very low               |

**S2 Table ( continued).** Quality Assessment of Included Studies

| Study                                                                    | Score for study design                | Risk of selection bias? | Risk of information bias?                     | Risk of attrition bias?                       | Adequate adjustment for confounding? | Accounted for reverse causality? | Should the score for study design be adjusted for study quality? | Score after adjustment |
|--------------------------------------------------------------------------|---------------------------------------|-------------------------|-----------------------------------------------|-----------------------------------------------|--------------------------------------|----------------------------------|------------------------------------------------------------------|------------------------|
| Garcia 2011                                                              | Low - Prospective cohort              | No                      | No                                            | No                                            | Yes                                  | Yes                              | Yes                                                              | Moderate               |
| Hajeebhoy 2014                                                           | Low - Cross-sectional                 | Yes - cross sectional   | Yes - median age as assessment was 3.3 months | No - not applicable due to study design       | No                                   | No                               | Yes                                                              | Very low               |
| Meshram 2012                                                             | Low - Cross-sectional                 | Yes - cross sectional   | No                                            | No - not applicable due to study design       | No                                   | Yes                              | Yes                                                              | Very low               |
| Mullany 2008                                                             | Low - Prospective cohort (within RCT) | No                      | No                                            | No                                            | Yes                                  | Yes                              | Yes                                                              | Moderate               |
| Mullany 2010                                                             | Low - Prospective cohort (within RCT) | No                      | No                                            | No                                            | Yes                                  | Yes                              | Yes                                                              | Moderate               |
| Mullany 2009                                                             | Low - Prospective cohort (within RCT) | No                      | No                                            | No (89% of infants receive all 6 assessments) | Yes                                  | Yes                              | Yes                                                              | Moderate               |
| Neovita 2016<br>[Includes: Edmond 2015<br>Masanja 2015<br>Mazunder 2015] | Low - Prospective cohort (within RCT) | No                      | No                                            | Very low LTFU                                 | Yes                                  | Early deaths excluded            | Yes                                                              | Moderate               |
| Niswade 2011                                                             | Low - Prospective cohort              | No                      | No - visited on day 0 and day 1               | No                                            | Yes                                  | No                               | Yes                                                              | Very low               |

**S2 Table ( continued).** Quality Assessment of Included Studies

| Study              | Score for study design                | Risk of selection bias? | Risk of information bias?                                         | Risk of attrition bias?                 | Adequate adjustment for confounding? | Accounted for reverse causality?                                     | Should the score for study design be adjusted for study quality? | Score after adjustment |
|--------------------|---------------------------------------|-------------------------|-------------------------------------------------------------------|-----------------------------------------|--------------------------------------|----------------------------------------------------------------------|------------------------------------------------------------------|------------------------|
| Shah 2014          | Low - Prospective cohort (within RCT) | No                      | No - visisted on day of birth                                     | No (~10% excluded due to missing LMP)   | Yes                                  | Yes                                                                  | Yes                                                              | Moderate               |
| Sutan 2014         | Low - Case control                    | No                      | Yes - retrospective assessment of breastfeeding after child death | No - not applicable due to study design | Yes                                  | No                                                                   | Yes                                                              | Very low               |
| Van den Bosch 1990 | High - Randomized Control Trial       | No                      | No                                                                | No (~11% missing 24 hour measurement)   | N/A (due to study design)            | Yes - preterm, low birthweight, and low Apgar score infants excluded | Yes                                                              | High                   |
| Wren 2015          | Low - Cross-sectional                 | Yes - cross sectional   | No                                                                | No - not applicable due to study design | No                                   | Yes                                                                  | Yes                                                              | Very low               |
