# Supplementary material for: Delayed breastfeeding initiation and infant survival: A systematic review and meta-analysis
Source: PubMed Central journal article supplement (PMC5528898; doi:10.1371/journal.pone.0180722), 2017-07-26
Supplement: pone.0180722.s005.pdf [file pone.0180722.s005.pdf]

**S3 Table.** Summary of studies of the association between early breastfeeding initiation and nutrition outcomes. (\*Reference group)

| <b>Malnutrition (Stunting / HAZ)</b>    |             |                    |                                                                       |                                          |                                                                                                                   |          |
|-----------------------------------------|-------------|--------------------|-----------------------------------------------------------------------|------------------------------------------|-------------------------------------------------------------------------------------------------------------------|----------|
| Study                                   | Sample Size | Study Design       | Exposure Definition                                                   | Outcome Definition                       | Effect Estimate                                                                                                   | Quality  |
| Wren 2015                               | 190         | Cross-Sectional    | Early (<1 hr)* vs. Late (>1 hr) breastfeeding initiation              | HAZ < -2 SD at <46 days                  | RR: 1.67 (95% CI: 1.15-2.43)                                                                                      | Very Low |
| Meshram 2012                            | 351         | Cross-Sectional    | Early (<1 hr)* vs. Late (>1 hr) breastfeeding initiation              | HAZ < -2 SD at 1 year                    | RR: 1.19 (95% CI: 0.63-2.26)                                                                                      | Very Low |
| Engelbrechtsen 2008                     | 723         | Cross-Sectional    | Early (<2 hrs)* vs. Late (2-24 hrs, >24 hrs) breastfeeding initiation | HAZ < -2 SD at <1 year                   | OR: (2-24 hrs): 1.06 (95% CI: 0.56-1.99)<br>OR: (>24 hrs): 1.27 (95% CI: 0.80-2.03)                               | Very Low |
| <b>Malnutrition (Wasting / WHZ)</b>     |             |                    |                                                                       |                                          |                                                                                                                   |          |
| Wren 2015                               | 190         | Cross-Sectional    | Early (<1 hr)* vs. Late (>1 hr) breastfeeding initiation              | WHZ < -2 SD at <46 days                  | RR: 0.84 (95% CI: 0.14-4.88)                                                                                      | Very Low |
| Meshram 2012                            | 351         | Cross-Sectional    | Early (<1 hr)* vs. Late (>1 hr) breastfeeding initiation              | WHZ < -2 SD at 1 year                    | RR: 0.85 (95% CI: 0.52-1.38)                                                                                      | Very Low |
| Engelbrechtsen 2008                     | 723         | Cross-Sectional    | Early (<2 hrs)* vs. Late (2-24 hrs, >24 hrs) breastfeeding initiation | WHZ < -2 SD at <1 year                   | OR: (2-24 hrs): 1.07 (95% CI: 0.39-2.92)<br>OR: (>24 hrs): 0.81 (95% CI: 0.33-2.06)                               | Very Low |
| <b>Malnutrition (Underweight / WAZ)</b> |             |                    |                                                                       |                                          |                                                                                                                   |          |
| Wren 2015                               | 190         | Cross-Sectional    | Early (<1 hr)* vs. Late (>1 hr) breastfeeding initiation              | WAZ < -2 SD at <46 days                  | RR: 3.06 (95% CI: 1.49-6.29)                                                                                      | Very Low |
| Meshram 2012                            | 351         | Cross-Sectional    | Early (<1 hr)* vs. Late (>1 hr) breastfeeding initiation              | WAZ < -2 SD at 1 year                    | RR: 0.87 (95% CI: 0.59-1.28)                                                                                      | Very Low |
| <b>Malnutrition (Early weight loss)</b> |             |                    |                                                                       |                                          |                                                                                                                   |          |
| Dewey 2003                              | 280         | Prospective Cohort | Early (<1 hr) vs. Late (>1 hr) breastfeeding initiation               | Weight loss >10% since birth at 3 days   | RR: 1.20 (95% CI: 0.62-2.33)                                                                                      | Very Low |
| Caglar 2006                             | 90          | Case-Control       | Mean time to first breastfeeding (hrs)                                | Weight loss ≥10% since birth at 4-9 days | Weight loss ≥10% group: 3.89 hrs (SE 2.37)<br>Weight loss <10% group: 2.14 hrs (SE 1.31)                          | Very Low |
| Enzunga 1990                            | 330         | Prospective Cohort | Time of breastfeeding initiation (hrs)                                | Weight loss since birth                  | Time of breastfeeding initiation and weight loss were associated in univariate and multivariate linear regression | Very Low |
