# Supplementary material for: Delayed breastfeeding initiation and infant survival: A systematic review and meta-analysis
Source: PubMed Central journal article supplement (PMC5528898; doi:10.1371/journal.pone.0180722), 2017-07-26
Supplement: pone.0180722.s006.pdf [file pone.0180722.s006.pdf]

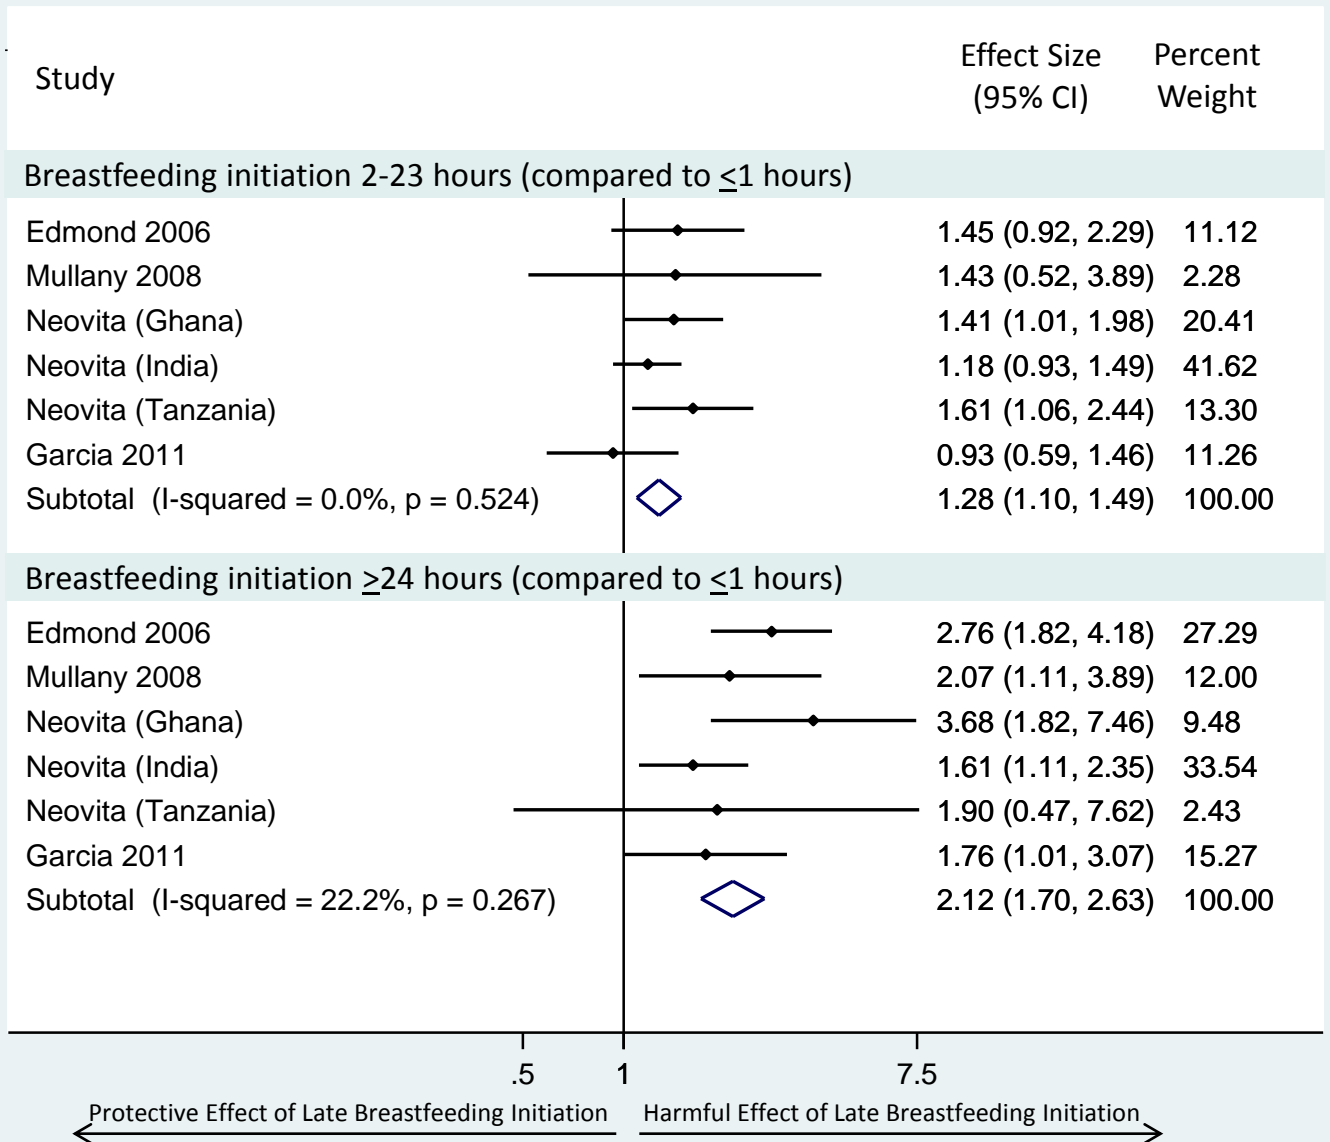

**S1 Fig.** Forest Plot of the relative risk of neonatal mortality (excluding deaths in the first 2-4 days) for infants who initiated breastfeeding 2-23 hours or  $>24$  hours after birth, compared to those who initiated breastfeeding early ( $<1$  or  $<1$  hour) including Garcia 2001 estimates.
